# Supplementary material for: Standardization of cytokine flow cytometry assays
Source: BMC Immunol. 2005 Jun 24;6:13. doi: 10.1186/1471-2172-6-13 (PMC1184077; doi:10.1186/1471-2172-6-13)
Supplement: Additional File 2 — Protocol for shipped whole blood (Experiment 2) [file 1471-2172-6-13-S2.pdf]

# CFC Standardization Protocol: Analysis of Shipped Whole Blood

## Description

This protocol is for activation, processing, and analysis of shipped whole blood in 96-well deep well plates. The protocol is designed for four-color staining of IFN $\gamma$ -producing cells using a CD4 and a CD8 T cell staining cocktail.

## Materials and Methods

**Table 1 CFC Staining and Activation Reagents**

| CFC Reagents                                                            | Source                       | Catalog Number |
|-------------------------------------------------------------------------|------------------------------|----------------|
| BD FastImmune CD4 Intracellular IFN $\gamma$ Detection Kit <sup>b</sup> | BDIS                         | Supplied       |
| BD FastImmune CD8 Intracellular IFN $\gamma$ Detection Kit              | BDIS                         | Supplied       |
| Deionized water <sup>c</sup>                                            |                              |                |
| Paraformaldehyde, 10%                                                   | Electron Microscopy Sciences | 15712-S        |
| PBS 1X <sup>c</sup>                                                     |                              |                |
| Bovine serum albumin (BSA) <sup>c</sup>                                 |                              |                |
| NaN <sub>3</sub> <sup>c</sup>                                           |                              |                |
| Staphylococcal enterotoxin B (SEB)                                      | Sigma                        | Supplied       |
| CMV pp65 peptide mix                                                    | BDIS                         | Supplied       |
| DMSO                                                                    | Sigma                        | D-8779         |
| BD CaliBRITE™ FITC + PE beads                                           | BDIS                         | 349502         |
| BD CaliBRITE PerCP-Cy5.5 beads                                          | BDIS                         | 345036         |
| BD CaliBRITE APC beads                                                  | BDIS                         | 340487         |

<sup>a</sup> BDIS: BD Biosciences, Immunocytometry Systems

<sup>b</sup> BD FastImmune intracellular detection kits include Brefeldin A, EDTA, BD FACS Lysing Solution, and BD FACS Permeabilization Solution 2.

<sup>c</sup> No specific manufacturer recommended

**Table 2 Accessory Products and Instrumentation**

| Product                                                                                                                         | Source                                      | Catalog Number |
|---------------------------------------------------------------------------------------------------------------------------------|---------------------------------------------|----------------|
| 96-well deep well conical bottom plate                                                                                          | BDDL <sup>a</sup>                           | 353966         |
| Lid for 96-well deep well conical bottom plate                                                                                  | BDDL                                        | 351191         |
| Single- and multi-channel pipettors and tips <sup>b</sup>                                                                       |                                             |                |
| Serological pipettor <sup>b</sup> (Pipet-Aid or equivalent) and pipets                                                          |                                             |                |
| Table top centrifuge with deep well plate holders <sup>b</sup><br>(e.g. Sorvall RT6000 centrifuge, plate holder catalog #11093) |                                             |                |
| 37°C incubator or water bath <sup>b</sup>                                                                                       |                                             |                |
| BD FACSCalibur brand flow cytometer                                                                                             | BDIS <sup>a</sup>                           |                |
| BD Multiwell Autosampler (optional)                                                                                             | BDIS                                        | 342364         |
| 35 mm multiwell plate aspirator manifold                                                                                        | V&P Scientific, Inc.<br>San Diego, CA 92121 | VP 187A        |
| Vacuum source for above <sup>b</sup>                                                                                            |                                             |                |

<sup>a</sup> BDIS: BD Biosciences, Immunocytometry Systems. BDDL: BD Biosciences, Discovery Labware

<sup>b</sup> No specific manufacturer recommended

Please follow all recommended precautions that are provided in the technical data sheet of each manufacturer's product.

## Instructions for Processing Reagents

### Antigens

SEB (positive activation control): Supplied as a working stock of 50 µg/ml in sterile PBS.

CMV pp65 peptide mix: On day of use, dilute 1:10 in sterile PBS to arrive at a working stock of 0.07 mg/mL per peptide.

### Brefeldin A (BFA) from FastImmune kit

Upon receipt, thaw BFA, dispense into 30 µl aliquots, and store at -20°C. On day of use, remove an aliquot from the freezer, and dilute 1:10 with sterile PBS. Discard any unused portion.

### FACS Lysing Solution and FACS Permeabilizing Solution 2 from FastImmune kit

Dilute each 10X solution in deionized water to make 1X working solution. Store at room temperature.

### Paraformaldehyde in PBS, 1%

Dilute 10% solution of paraformaldehyde 1:10 in 1X PBS. Store at 4°C.

### Wash buffer

First prepare stock solutions of 5% BSA in deionized water (filter sterilize) and 10% NaN<sub>3</sub> in deionized water. Then prepare 500 mL of wash buffer by adding 50 mL of 5% BSA stock solution and 5 mL of 10% NaN<sub>3</sub> stock solution to 445 mL of 1X sterile PBS. This represents final concentrations of 0.5% BSA and 0.1% NaN<sub>3</sub> in PBS. Store at 4°C.

## Protocol

### Activation

1. Prepare working stock solution of pp65 peptide mix and 1:10 DMSO in PBS.
2. Label three tubes as "Control", "SEB," and "Peptide." Prepare stimulation reagents in bulk by combining stimulus (or 1:10 DMSO for control), BFA, and PBS into the appropriately labeled tubes. Amounts in the table below will provide more than enough reagent to stimulate blood from 3 donors, with two staining conditions for each stimulus (except SEB, for which two extra wells are plated for each donor and used for isotype control staining). If extra staining conditions are to be tested, the amounts below should be increased proportionally.

Stimulus preparation for study:

| Condition         | Stimulus | BFA   | PBS    | Total volume |
|-------------------|----------|-------|--------|--------------|
| 1:10 DMSO control | 38 µL    | 30 µL | 82 µL  | 150 µL       |
| SEB               | 60 µL    | 60 µL | 180 µL | 300 µL       |
| Pp65 peptide mix  | 38 µL    | 30 µL | 82 µL  | 150 µL       |

3. Dispense 20 µl of appropriate stimulus reagent to each well of a 96-well deep well plate.
4. Add 200 µl heparinized whole blood to each well. Mix by gentle pipetting.
5. Incubate covered plate for six hours at 37°C.

Following incubation, cells may be held in covered plate at 18°C for up to 18 hours.

6. Add 20  $\mu$ L of EDTA to each well and incubate for 15 minutes at room temperature. Mix each well by pipetting up and down.
7. Add 1.5 mL of 1X BD FACS Lysing Solution to each well. Incubate at room temperature for 10 minutes.
8. Centrifuge at room temperature at 500 x g for five minutes.
9. Aspirate supernatant. Pipet up and down in residual volume to loosen cell pellets.

Cells may be frozen at this point: place covered plate, containing cells in residual FACS Lysing Solution, in  $-80^{\circ}\text{C}$  freezer. When ready to stain, thaw plate at  $37^{\circ}\text{C}$  and continue as below.

### Permeabilization and Staining

1. Add 1 mL of BD FACS Permeabilizing Solution 2 per well. Incubate at room temperature for 10 minutes.
2. Fill each well with 0.5 mL of wash buffer and centrifuge at room temperature at 500 x g for five minutes.
3. Aspirate supernatant.
4. Fill each well with 1.5 mL of wash buffer and centrifuge at room temperature at 500 x g for five minutes.
5. Aspirate supernatant.
6. Add appropriate staining mAbs to each well, pipetting to resuspend pellets. Incubate for 60 minutes at room temperature in the dark.
7. Fill each well with 1.5 mL of wash buffer and centrifuge at room temperature at 500 x g for five minutes.
8. Aspirate supernatant.
9. Repeat steps 7 and 8 one additional time.
10. Resuspend pellet with 200  $\mu$ L cold 1% paraformaldehyde.
11. Keep plate at  $4^{\circ}\text{C}$  in the dark until FACS acquisition, which should be performed within 24 hours.

### Acquisition

1. Using BD FACSCComp™ software and BD CaliBRITE™ reagents, set voltages and compensation on flow cytometer (use Lyse No Wash settings in FACSCComp). Be sure to replace the FL3 threshold created by FACSCComp with an appropriate FSC threshold. Set an acquisition gate on lymphocytes.
2. Acquire 40,000 relevant (CD4+ or CD8+) events. Gating on CD3+CD4+ or CD3+CD8+ cells, report the % CD69+IFN $\gamma$ + gated events for each sample. Also send the FCS files on a CD or Zip disk to: Holden Maecker, BD Biosciences, 2350 Qume Drive, San Jose, CA 95131. Thank you!
